# Supplementary material for: Inhibition of the NLRP3 inflammasome improves lifespan in animal murine model of Hutchinson–Gilford Progeria
Source: PubMed Central journal article supplement (PMC8495449; doi:10.15252/emmm.202114012), 2021-08-27

Figure 2B

Lamin A/C

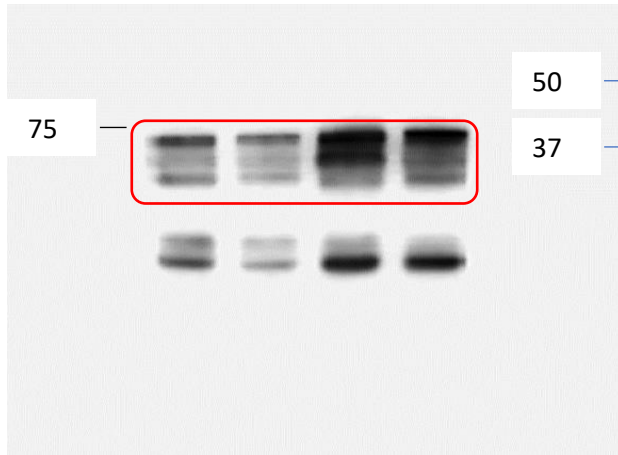

Actin

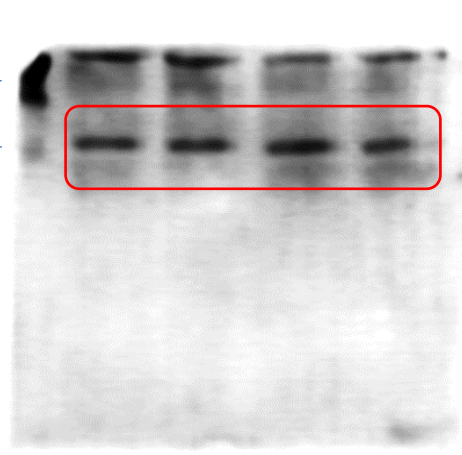

NLRP3

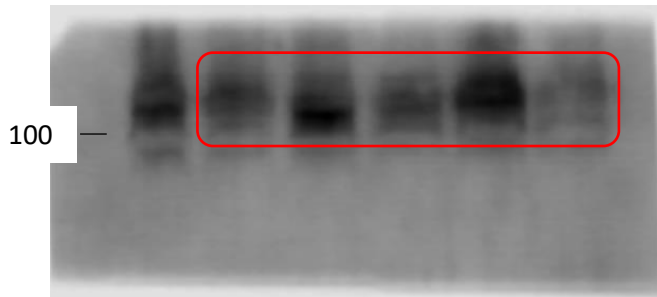

Caspase 1

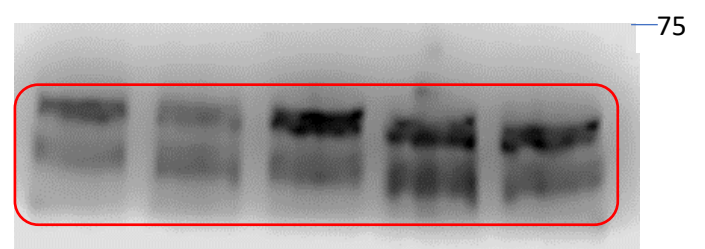

IL-1beta

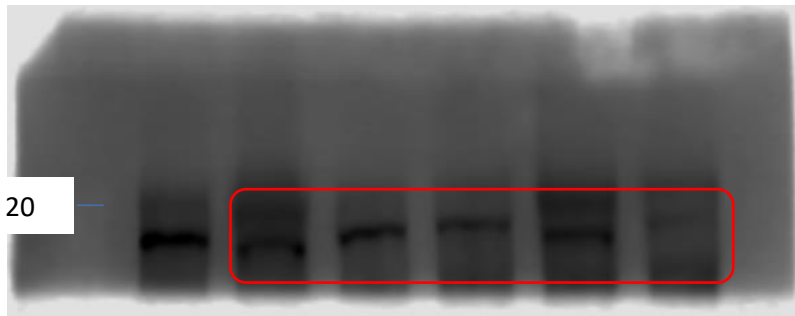

Actin

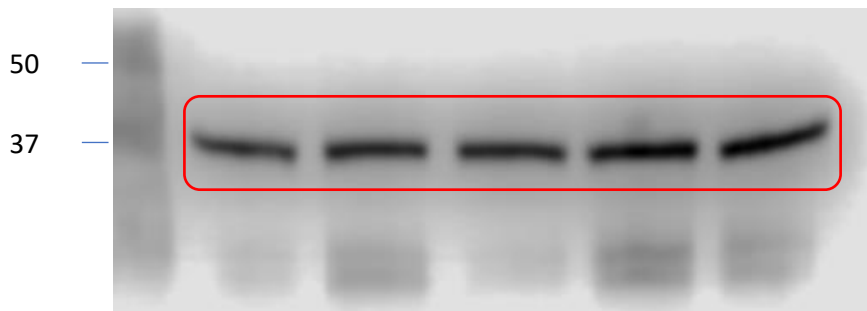

Supplement: EMMM-13-e14012-s003.pdf [file EMMM-13-e14012-s003.pdf]
