# Supplementary material for: Inhibition of the NLRP3 inflammasome improves lifespan in animal murine model of Hutchinson–Gilford Progeria
Source: PubMed Central journal article supplement (PMC8495449; doi:10.15252/emmm.202114012), 2021-08-27
Supplement: EMMM-13-e14012-s005.pdf [file EMMM-13-e14012-s005.pdf]

## Expanded View Figures

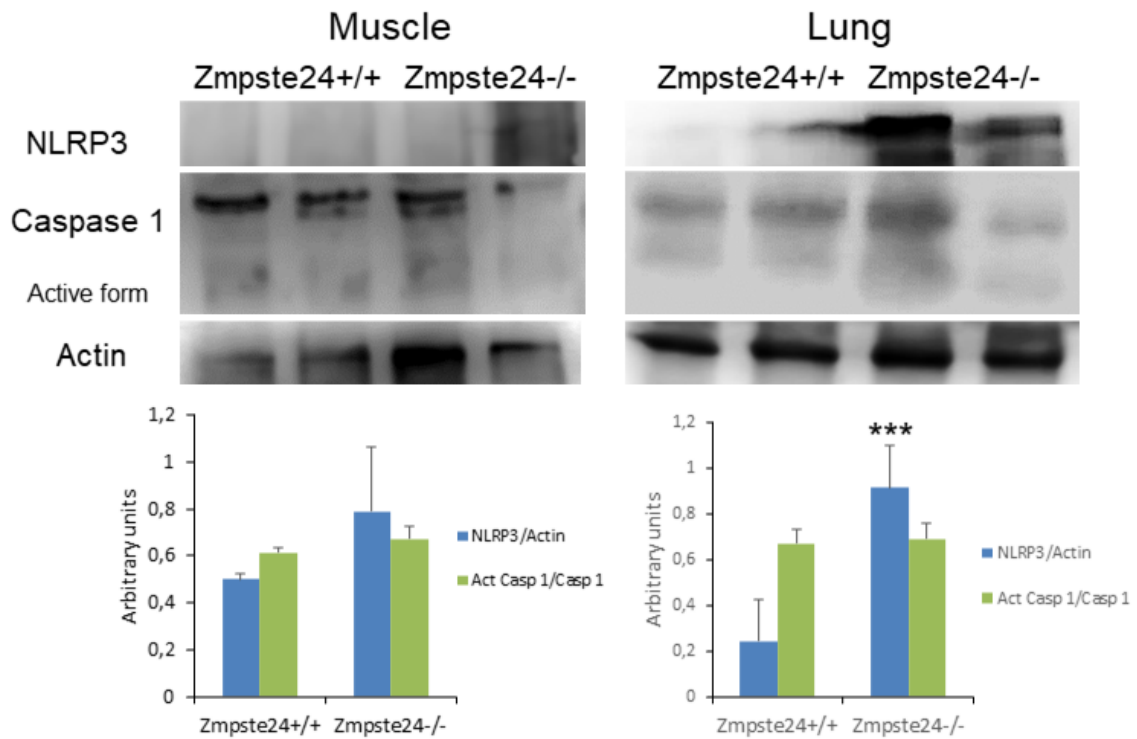

**Figure EV1. NLRP3 inflammasomes expression in lung and muscle from progeroid animals.**

Western blot analysis with representative blot including NLRP3, caspase 1, and actin levels in lung and muscle tissues from wild-type and *Zmpste24*<sup>-/-</sup> mice. Densitometric analysis is shown as means  $\pm$  SD,  $n = 5$  mice per group. Data are shown as means  $\pm$  SD. \*\*\* $P < 0.001$ , wild-type vs *Zmpste24*<sup>-/-</sup> mice. One-way ANOVA test was used for statistical analysis.

Source data are available online for this figure.

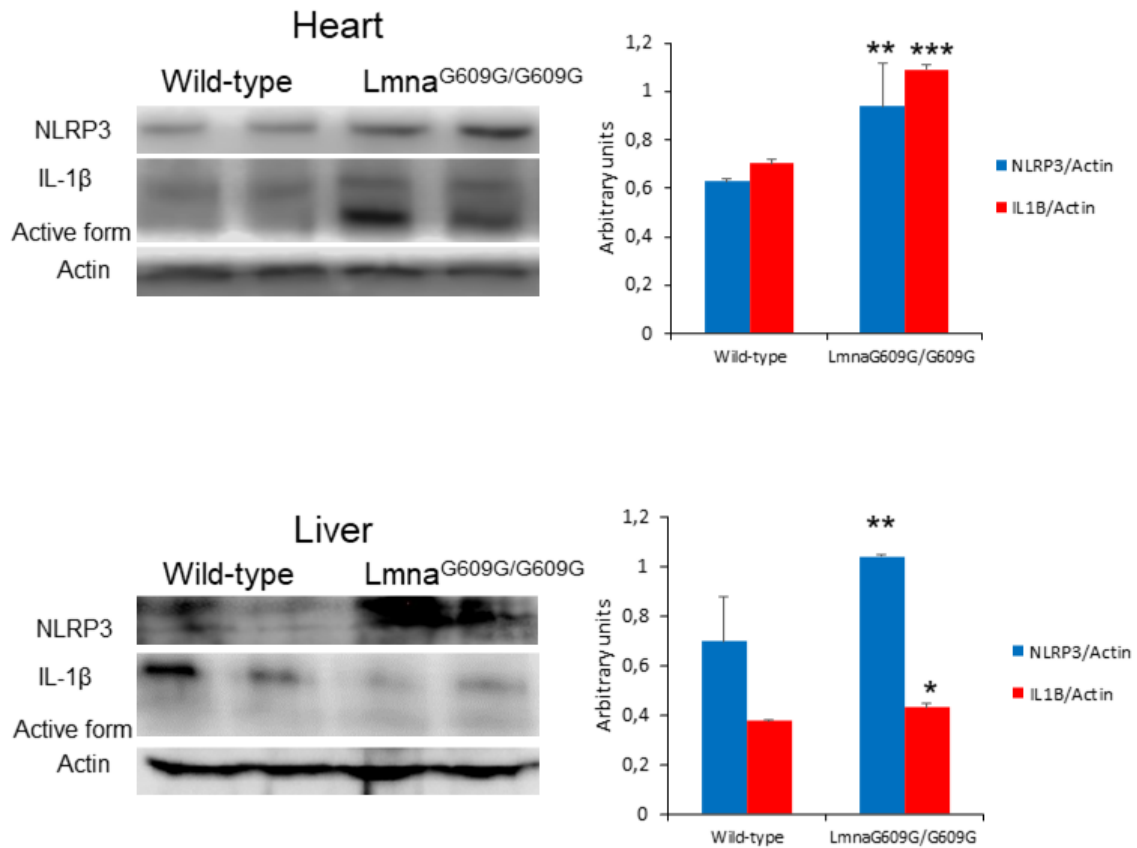

**Figure EV2. NLRP3 inflammasomes expression in heart and liver from Lmna<sup>G609G/G609G</sup> mice.**

Western blot analysis with representative blot including NLRP3, IL-1 $\beta$ , and actin levels in cardiac and liver tissues from wild-type and Lmna<sup>G609G/G609G</sup> mice. Densitometric analysis is shown as means  $\pm$  SD,  $n = 4$  mice per group. Data are shown as means  $\pm$  SD. \*\*\* $P < 0.001$ , \*\* $P < 0.005$ , \* $P < 0.05$  wild-type vs Lmna<sup>G609G/G609G</sup> mice. One-way ANOVA test was used for statistical analysis.

Source data are available online for this figure.
